# Supplementary material for: Staphylococcus aureus Tissue Infection During Sepsis Is Supported by Differential Use of Bacterial or Host-Derived Lipoic Acid
Source: PubMed Central journal article supplement (PMC5049849; doi:10.1371/journal.ppat.1005933), 2016-10-04
Supplement: ppat.1005933.s001.pdf [file ppat.1005933.s001.pdf]

**Figure S1.** Amino Acid sequence alignment of lipoic acid biosynthesis and salvage enzymes. *Bs* – *B. subtilis*; *Lm* – *L. monocytogenes*; *Sa* – *S. aureus*

|                     |     |                                                                |     |
|---------------------|-----|----------------------------------------------------------------|-----|
| <i>Bs LipA</i>      | 1   | MAKKDEH-LRKPEWLKIKLNTNENYTGKMKLMRENNLHTVCEEAKCPNIHECWAVRRAT    | 59  |
| <i>Sa LipA</i>      | 1   | MATKNEEILRKPDWLKIKLNTNENYTGKMKMMREKNLNTVCEEAKCPNIHECWGARAT     | 60  |
| <i>Bs LipA</i>      | 60  | FILGVSCTRACRFCVKTGLPTELDLQEPERVADSVLMLNKHAVITAVARDDQKDGGA      | 119 |
| <i>Sa LipA</i>      | 61  | FILGAVCTRACRFCVKTGLPNELDLNEPERVAESVELMNLKHVVITAVARDDLDRDAGS    | 120 |
| <i>Bs LipA</i>      | 120 | GIFAETVRAIRRKSPFTTIEVLPSDMGGNYDNLKTLMMDTRPDILNHNIETVRRLLTPRVRA | 179 |
| <i>Sa LipA</i>      | 121 | NVYAETVRKVRERNPFTTIEILPSDMGGDYDALETLMASRPDILNHNIETVRRLLTPRVRA  | 180 |
| <i>Bs LipA</i>      | 180 | RATYDRSLEFLRRAKEMQDIPKSSIMIGLGETKEEIEVMDDLANNVDIMAIGQYLQ       | 239 |
| <i>Sa LipA</i>      | 181 | RATYDRSLEFLRRSKELQDIPKSSIMVGLGETIEEIEYETMDDLRRANDVDILTIGQYLQ   | 240 |
| <i>Bs LipA</i>      | 240 | PTKHLKLVQKYYPDEFELKEIAMQKGFHCEAGPLVRSYHADEQVNEASKKROAQA        | 298 |
| <i>Sa LipA</i>      | 241 | PSRHLKLVQKYYPDEFGLKRVAMDKGFKHCQAGPLVRSYHADEQVNEAAKEKQRQG       | 299 |
| <u>79% Identity</u> |     |                                                                |     |
| <i>Bs LipM</i>      | 4   | ETWRFIDSGNASPAFNMALDEALLYWHSEKKIPVIRFYGWNPATLSVGYFQNIKKEINF    | 63  |
| <i>Sa LipM</i>      | 3   | ETWRFINTGSKDPYNNMAMDEALLNFVSRGEIDPVIRFYTWNPATLSIGYFQRLQKEIDI   | 62  |
| <i>Bs LipM</i>      | 64  | EAVHKYNLGFVRRPTGGRGVLHDQELTYSVIVSEEHPEMPATVTEAYRVISSEGILQGRN   | 123 |
| <i>Sa LipM</i>      | 63  | DKVKEKGFVRRPTGGRGVLHDKELTYSVIVPESHNPMPSTVTEAYRVISQGLLEGFKN     | 122 |
| <i>Bs LipM</i>      | 124 | LGLDAYFAIPRTEKEKESLKNRPSVCFDAPSWYELVVEGRKVAGSAQTRQKGVILQHGS    | 183 |
| <i>Sa LipM</i>      | 123 | LGFDTYFAVPKTPPEERQKQPRSSVCFDAPSWYELVVEGRKIAGSAQTRQKGVILQHGS    | 182 |
| <i>Bs LipM</i>      | 184 | ILLDLDEDKLFDFLYPSEVRERMRNFKNKAVAINELIEKRVMTDEARKAFKEGFETG      | 243 |
| <i>Sa LipM</i>      | 183 | ILLQDIDIDELDFMFIYKNERLKLKMKAEFVEKAVAINDISDEHITISQMEAEFEGFKKG   | 242 |
| <i>Bs LipM</i>      | 244 | LNIHLEPYELSQEELDFVHHLAETKYASDEWNYKR                            | 278 |
| <i>Sa LipM</i>      | 243 | LNIEFKPLELTAQLAEVEELTE-KYRSDEWYFRK                             | 276 |
| <u>62% Identity</u> |     |                                                                |     |
| <i>Bs LipL</i>      | 30  | QSFAMDDTLCSVKGVSVPATARSVHHDITVLGIQDTRLPLQDGLSLESE-GYRVIV       | 88  |
| <i>Sa LipL</i>      | 2   | QSFADFDTFCESVKGDISDNVVRTWIHQHTVILGIHDSRLPFLKDGIDYLTNEIGYNAIV   | 61  |
| <i>Bs LipL</i>      | 89  | RNSGGLAVVLDGVLNLSLIFEDEKKGIDIDKGYEAMVELMRRMLRPYNAKIEAYEIEGS    | 148 |
| <i>Sa LipL</i>      | 62  | RNSGGLGVVLDQVNLNLSLIFMFKGQTE-TTIDEAFTVMYLLISKMFENENVDIDTMEIEHS | 120 |
| <i>Bs LipL</i>      | 149 | YCPGSYDLSINGKKFAGISQRRVRGGVAVQIYLCADKSGSERADLIRRFYQAALKDKQND   | 208 |
| <i>Sa LipL</i>      | 121 | YCPGKFDLSIDGKKFAGISQRRVRGGIAVQIYLCVEGSGSERALMMQTFYEHALKGEVTK   | 180 |
| <i>Bs LipL</i>      | 209 | KKGVYPEIRPETMASLSELLQKDISVQDLMFALLTELKALSTHLYSAGLSIDEEMEFKN    | 268 |
| <i>Sa LipL</i>      | 181 | FK--YPEIEPSCMASLETLLNKTITVQDVMFLLLYAIKDLGGVNLNMTPIQEEWQRYDTY   | 238 |
| <i>Bs LipL</i>      | 269 | LVRMAERNAKV                                                    | 279 |
| <i>Sa LipL</i>      | 239 | FDKMIERNKKM                                                    | 249 |
| <u>54% Identity</u> |     |                                                                |     |

**Figure S1.** Amino Acid sequence alignment of lipoic acid biosynthesis and salvage enzymes.  
*Bs* – *B. subtilis*; *Lm* – *L. monocytogenes*; *Sa* – *S. aureus*

|           |              |     |                              |                                                |                     |
|-----------|--------------|-----|------------------------------|------------------------------------------------|---------------------|
| <i>Bs</i> | <i>LplJ</i>  | 1   | MLFIDNQNINDPRINLAIEEYCVKHLDP | EQYLLFYVNQPSIIIGKNQNTIEEINTKYVE                | 60                  |
| <i>Sa</i> | <i>LplA1</i> | 1   | MKFISNNNITDPTLNLAMEEYVLK     | NLPAEESYFLFYINRPSIIVGKNQNTIEEVNQTYID           | 60                  |
| <i>Bs</i> | <i>LplJ</i>  | 61  | ENGIIVVRRRLSGGGAVYHDLGNL     | NFSFITKDDGDSFHNFKKFTEPVIQALHQLGVEAELS          | 120                 |
| <i>Sa</i> | <i>LplA1</i> | 61  | AHNIDVVRRLISGGGAVYHDTGNL     | NFSFITDDGNSFHNFKKFTEPIVQALQSLGVNAELT           | 120                 |
| <i>Bs</i> | <i>LplJ</i>  | 121 | GRNDIVDGRKISGNAQFATKGRIF     | SHGTLMFDSAIDHVVSALKVKKDKIESKGIKSIRS            | 180                 |
| <i>Sa</i> | <i>LplA1</i> | 121 | GRNDIQVGQAKISGNAMVKVKNRM     | FSHGTLMLNSDLDEVQNALKVNPAKIKSKGIKSVRK           | 180                 |
| <i>Bs</i> | <i>LplJ</i>  | 181 | RVANISEFLDDKMTTEEFRSHLLR     | HFINTNDVGNVPEYKLTEKDWETIHQISKERYQNW            | 240                 |
| <i>Sa</i> | <i>LplA1</i> | 181 | RVANIQEFLNDFLEIEEFKKIILK     | TIFGETE---VEEYKLTDEDWENIEKLSNDKYRTWE           | 237                 |
| <i>Bs</i> | <i>LplJ</i>  | 241 | WNYGRSPKFNLNHRSKRYPVGS       | IDLHLEVKKGKIEDCKIFGDFFGVDVSEIENLLVGKQY         | 300                 |
| <i>Sa</i> | <i>LplA1</i> | 238 | WNYGRNPKYNFEREEKFEKGFVQ      | IKFDVVRGKIEHAKIFGDFFGVDVTDLENALVGCLH           | 297                 |
| <i>Bs</i> | <i>LplJ</i>  | 301 | ERSVIADVLEGVNLKHYFGNITKED    | FLDLI 330                                      |                     |
| <i>Sa</i> | <i>LplA1</i> | 298 | DFEHIEEALSEYDLYHYFGDIDR      | HELIRLM 327                                    | <b>57% Identity</b> |
| <i>Bs</i> | <i>LplJ</i>  | 9   | INDPRINLAIEEYCVKHLDP         | EQYLLFYVNQPSIIIGKNQNTIEEINTKYVEENGIIVR         | 68                  |
| <i>Sa</i> | <i>LplA2</i> | 13  | ITDGAIALAMQVYVNQHIFLDE       | DILFPYCDPKVEIGRFQNTAIEVNQDYIDKHSIQVVR          | 72                  |
| <i>Bs</i> | <i>LplJ</i>  | 69  | RLSGGGAVYHDLGNLNF            | SFITKDDGDSFHNFKKFTEPVIQALHQLGV-EAELSGRNDIV     | 127                 |
| <i>Sa</i> | <i>LplA2</i> | 73  | RDTGGGAVYVDKGA               | VNMCCILEQDTSIYGDFQRFYQPAIKALHTLGATDVVQSGRNDLTL | 132                 |
| <i>Bs</i> | <i>LplJ</i>  | 128 | DGRKISGNAQFATKGRIF           | SHGTLMFDSAIDHVVSALKVKKDKIESKGIKSIRSRVANISE     | 187                 |
| <i>Sa</i> | <i>LplA2</i> | 133 | NGKKVSGAAMTLMN               | NRIYGGYSLLLDVNYEAMDKVLKPNRKKIASKGIKSVRARVGH    | 192                 |
| <i>Bs</i> | <i>LplJ</i>  | 188 | FLDDK---MTTEEFRSHLLR         | HFINTNDVGNVPEYKLTEKDWETIHQISKERYQNW            | 244                 |
| <i>Sa</i> | <i>LplA2</i> | 193 | ALDEKYRDITIEEFK              | NLMVQTILGIDDIKEAKRYELTDADWEAIDELADKKYKNW       | 252                 |
| <i>Bs</i> | <i>LplJ</i>  | 245 | RSPKFNLNHRSKRYPVGS           | IDLHLEVKKGKIEDCKIFGDFFGVDVSEIENLLVGKQYERSV     | 304                 |
| <i>Sa</i> | <i>LplA2</i> | 253 | KSPKYEYNRSERLSS              | GTVDITISVEQNRIADCRIYGDFFGQGDIKDVEEALQGT        | 312                 |
| <i>Bs</i> | <i>LplJ</i>  | 305 | IADVLEGVNLKHYFGNITKED        | FLDLI 330                                      |                     |
| <i>Sa</i> | <i>LplA2</i> | 313 | LTHQLKQLDIVYF                | SNVTVEALVDMI 338                               | <b>39% Identity</b> |

**Figure S1.** Amino Acid sequence alignment of lipoic acid biosynthesis and salvage enzymes. *Bs* – *B. subtilis*; *Lm* – *L. monocytogenes*; *Sa* – *S. aureus*

|           |              |     |                                                               |                     |
|-----------|--------------|-----|---------------------------------------------------------------|---------------------|
| <i>Lm</i> | <i>LplA1</i> | 1   | MYFIDNNNEKDPRLNLAEEFILTELNLDEPVLLFYINKPSIIIGRNQNTVEEIDTEYVE   | 60                  |
| <i>Sa</i> | <i>LplA1</i> | 1   | MKFISSNNITDPTLNLAEEYVLKLNPAEESYFLFYINRPSIIVGKNQNTIEEVNQTYID   | 60                  |
| <i>Lm</i> | <i>LplA1</i> | 61  | KNDVIVVRRLSGGGAVYHDEGNLNFSEFITDDGESFHNFAKFTQPIVEALKRGLGVNAELK | 120                 |
| <i>Sa</i> | <i>LplA1</i> | 61  | AHNIDVVRRISSGGGAVYHDTGNLNFSEFITDDGNSFHNFKFTTEPIVQALQSLGVNAELT | 120                 |
| <i>Lm</i> | <i>LplA1</i> | 121 | GRNDLLIDGFKVSGNAQFATKGKMFSGHTLMYDLNLDNVAASLKPRKDKIESKGIKSVRS  | 180                 |
| <i>Sa</i> | <i>LplA1</i> | 121 | GRNDIQVGQAKISGNAMVKVKNRMFSHGTLMLNSDLDEVQNALKVNPAKIKSKGIKSVRK  | 180                 |
| <i>Lm</i> | <i>LplA1</i> | 181 | RVANISDFMDQEMTTEEFRDLLLLYIFGVEKVEDVKEYKLTAADWEKIHEISAKRYGNWD  | 240                 |
| <i>Sa</i> | <i>LplA1</i> | 181 | RVANIQEFLNDPFEIEEFKKIILKTIFGETEVE---EYKLTDEDWENIEKLSNDKYRTWE  | 237                 |
| <i>Lm</i> | <i>LplA1</i> | 241 | WNYGKSPKFDLTRTKRFPVGAVDVRLNVQKGVITDIKIFGDFFGVKNVADIEEKLVTNTTY | 300                 |
| <i>Sa</i> | <i>LplA1</i> | 238 | WNYGRNPKYNFEREEKFEKGFVQIKFDVVRGKIEHAKIFGDFFGVDVTDLENALVGCLH   | 297                 |
| <i>Lm</i> | <i>LplA1</i> | 301 | KREVLAEALVDIDVKEYFGNITKDEFLDLL                                | 330                 |
| <i>Sa</i> | <i>LplA1</i> | 298 | DFEHIEEALSEYDLYHYFGDIDRHELIRLM                                | 327                 |
|           |              |     | <b>E + EAL + D+ YFG+I + E + L+</b>                            | <b>53% Identity</b> |
| <i>Lm</i> | <i>LplA1</i> | 1   | MYFID--NNNE--KDPRLNLAEEFILTELNLDEPVLLFYINKPSIIIGRNQNTVEEIDT   | 56                  |
| <i>Sa</i> | <i>LplA2</i> | 1   | MYLIEPIRNGEYITDGAIALAMQVYVNHIFLDEDILFPYYCDPKVEIGRFQNTAIEVNO   | 60                  |
| <i>Lm</i> | <i>LplA1</i> | 57  | EYVEKNDVIVVRRLSGGGAVYHDEGNLNFSEFITDDGESFHNFAKFTQPIVEALKRGLGVN | 116                 |
| <i>Sa</i> | <i>LplA2</i> | 61  | DYIDKHSIQVRRDGTGGGAVYVDKGAVMCCILEQDTSIYGDFQRFYQPAIKALHTLGAT   | 120                 |
| <i>Lm</i> | <i>LplA1</i> | 117 | AELK-GRNDLLIDGFKVSGNAQFATKGKMFSGHTLMYDLNLDNVAASLKPRKDKIESKGI  | 175                 |
| <i>Sa</i> | <i>LplA2</i> | 121 | DVVQSGRNDLTLNGKKSVAAMTLMNRIYGGYSLLDVNYEAMDKVLKPNRKKIASKGI     | 180                 |
| <i>Lm</i> | <i>LplA1</i> | 176 | KSVRSRVANISDFMDQ---EMTTEEFRDLLLLYIFGVEKVEDVKEYKLTAADWEKIHEIS  | 232                 |
| <i>Sa</i> | <i>LplA2</i> | 181 | KSVRARVGHREALDEKYRDIETIEEFKNLMVTOILGIDDIKEAKRYELTDADWEAIDELA  | 240                 |
| <i>Lm</i> | <i>LplA1</i> | 233 | AKRYGNWDWNYGKSPKFDLTRTKRFPVGAVDVRLNVQKGVITDIKIFGDFFGVKNVADIE  | 292                 |
| <i>Sa</i> | <i>LplA2</i> | 241 | DKKYKNWDWNYGKSPKYEYNSRERLSSGTVDITISVEQNRIADCRIYGDFFGQGDIKDVE  | 300                 |
| <i>Lm</i> | <i>LplA1</i> | 293 | EKLVTNTTYKREVLAEALVDIDVKEYFGNITKDEFLDLL                       | 330                 |
| <i>Sa</i> | <i>LplA2</i> | 301 | EALQGTKMTREDLTHQLKQLDIVVYFSNVTVEALVDMI                        | 338                 |
|           |              |     | <b>E L T R E L L +D+ YF N+T + +D++</b>                        | <b>41% Identity</b> |

**Figure S1.** Amino Acid sequence alignment of lipoic acid biosynthesis and salvage enzymes. *Bs* – *B. subtilis*; *Lm* – *L. monocytogenes*; *Sa* – *S. aureus*

|           |              |     |                                                                    |     |
|-----------|--------------|-----|--------------------------------------------------------------------|-----|
| <i>Lm</i> | <i>Lp1A2</i> | 1   | MIYLDNEDVLDQAYNFAMEEYALRSLDENETYFMFYRMKPTIIIVGKNQNTLEEINHPFVK      | 60  |
|           |              |     | <b>M ++ N ++ D N AMEEY L++L E+YF+FY +P+IIVGKNQNT+EE+N ++</b>       |     |
| <i>Sa</i> | <i>Lp1A1</i> | 1   | MKFISNNNITDPTLNLAMEEYVLKNLPAEESYFLFYINRPSIIIVGKNQNTIEEVNQTYID      | 60  |
| <i>Lm</i> | <i>Lp1A2</i> | 61  | DHHIDVLRRLSGGGAVYNDEGNISFSMITKDDGNSFQNFQFAKFTPEVIRALRKLGVNAELS     | 120 |
|           |              |     | <b>H+IDV+RR+SGGGAVY+D GN++FS IT DDGNSF NF KFTEP+++AL+ LGVNAEL+</b> |     |
| <i>Sa</i> | <i>Lp1A1</i> | 61  | AHNIDVRRISGGGAVYHDTGNLNFSTITDDGNSFHNFQKFTEPIVQALQSLGVNAELT         | 120 |
| <i>Lm</i> | <i>Lp1A2</i> | 121 | GRNDIEVNGKKISGNAQFATKGRLYSHGTLFLFDVLSMLEKALQVDPEKYLSKGVKSVRS       | 180 |
|           |              |     | <b>GRNDI+V KISGNA K R++SHGTL+ + DL ++ AL+V+P K SKG+KSVR</b>        |     |
| <i>Sa</i> | <i>Lp1A1</i> | 121 | GRNDIQVQAKISGNAMVKVKNRMFSGHTLMLNSDLDEVQNALKVNPAAIKSKGIKSVRK        | 180 |
| <i>Lm</i> | <i>Lp1A2</i> | 181 | RVTTIREHLAEDIDILTFKQILLESIFETKDIPIRYTFTEADKQIEKLRTERYRNWDWTY       | 240 |
|           |              |     | <b>RV I+E L + ++I FK+I+L++IF ++ Y T+ D + IEKL ++YR W+W Y</b>       |     |
| <i>Sa</i> | <i>Lp1A1</i> | 181 | RVANIQEFLNDPLEIEEFKKIILKTIFGETEVEEYKLTDEDWENIEKLSNDKYRTWEWNY       | 240 |
| <i>Lp</i> | <i>Lp1A2</i> | 241 | GKSPKATIKRKRFPAGTIEFQVSLEKQVKEATIIYGDFFGTEDVAELAEKIIGCRFERK        | 300 |
|           |              |     | <b>G++PK +R+++F G ++ + +++G+++ A I+GDFFG DV +L ++GC + +</b>        |     |
| <i>Sa</i> | <i>Lp1A1</i> | 241 | GRNPKYNFEREEKFEKGFVQIKFDVVKRGLIEHAKIFGDFFGVDVTDLENALVGCLHDFE       | 300 |
| <i>Lm</i> | <i>Lp1A2</i> | 301 | SIQNAWQEINAKDYFGGIEKEAILDML                                        | 327 |
|           |              |     | <b>I+ A E + YFG I++ ++ ++</b>                                      |     |
|           |              |     | <b>47% Identity</b>                                                |     |
| <i>Sa</i> | <i>Lp1A1</i> | 301 | HIEEALSEYDLYHYFGDIDRHELIRLM                                        | 327 |
| <i>Lm</i> | <i>Lp1A2</i> | 5   | DNEDVLDQAYNFAMEEYALRSLDENETYFMFYRMKPTIIIVGKNQNTLEEINHPFVKDHHI      | 64  |
|           |              |     | <b>+ E + D A AM+ Y + + +E Y P + +G+ QNT E+N ++ H I</b>             |     |
| <i>Sa</i> | <i>Lp1A2</i> | 9   | NGEYITDGAIALAMQVYVNVQHIFLDEDILFPYYCDPKVEIGRFQNTAIEVNQDYIDKHSI      | 68  |
| <i>Lm</i> | <i>Lp1A2</i> | 65  | DVLRRLSGGGAVYNDEGNISFSMITKDDGNSFQNFQFAKFTPEVIRALRKLGVNAEL-GRN      | 123 |
|           |              |     | <b>V+RR +GGGAVY D+G ++ I + D + + +F +F +P I+AL LG + SGRN</b>       |     |
| <i>Sa</i> | <i>Lp1A2</i> | 69  | QVVRRTDGGGAVYVDKGAVMCCILEQDTSIYGDFQRFYQPAIKALHTLGATDVVQSGRN        | 128 |
| <i>Lm</i> | <i>Lp1A2</i> | 124 | DIEVNGKKISGNAQFATKGRLYSHGTLFLFDVLSMLEKALQVDPEKYLSKGVKSVRSRVT       | 183 |
|           |              |     | <b>D+ +NGKK+SG A R+Y +LL DV+ ++K L+ + +K SKG+KSVR+RV</b>           |     |
| <i>Sa</i> | <i>Lp1A2</i> | 129 | DLTLNGKKVSGAAMTLMNRIYGGYSLLDVNYEAMDKVLKPNRKKIASKGIKSVRARVG         | 188 |
| <i>Lm</i> | <i>Lp1A2</i> | 184 | TIREHLAE---DIDILTFKQILLESIFETKDIP---RYTFTEADKQIEKLRTERYRNWD        | 237 |
|           |              |     | <b>+RE L E DI I FK +++ I DI RY T+AD + I++L ++Y+NWD</b>             |     |
| <i>Sa</i> | <i>Lp1A2</i> | 189 | HLREALDEKYRDITIEEFKNLMVTQILGIDDIKEAKRYELTDADWEAIDELADKKYKNWD       | 248 |
| <i>Lm</i> | <i>Lp1A2</i> | 238 | WTYGKSPKATIKRKRFPAGTIEFQVSLEKQVKEATIIYGDFFGTEDVAELAEKIIGCRF        | 297 |
|           |              |     | <b>W YGKSPK R +R +GT++ +S+E+ ++ + IYGDFFG D+ ++ E + G +</b>        |     |
| <i>Sa</i> | <i>Lp1A2</i> | 249 | WNYGKSPKYEYNSERLSSGTVDITISVEQNRADCRITYGDFFGQGDIKDVEEALQGTKM        | 308 |
| <i>Lm</i> | <i>Lp1A2</i> | 298 | ERKSIQNAWQEINAKDYFGGIEKEAILDMLF                                    | 328 |
|           |              |     | <b>R+ + + +++++ YF + EA++DM+</b>                                   |     |
|           |              |     | <b>37% Identity</b>                                                |     |
| <i>Sa</i> | <i>Lp1A2</i> | 309 | TREDLTHQLKQLDIVVYFVSNVTVEALVDMIL                                   | 339 |
